# Supplementary material for: Blubber transcriptome response to acute stress axis activation involves transient changes in adipogenesis and lipolysis in a fasting-adapted marine mammal
Source: PubMed Central journal article supplement (PMC5301240; doi:10.1038/srep42110), 2017-02-10

Blubber transcriptome response to acute stress axis activation involves transient changes in adipogenesis and lipolysis in a fasting-adapted marine mammal. Khudyakov JI, Champagne CD, Meneghetti LM, Crocker DE.

### Supplementary File S4. Capillary gel electrophoresis traces of RNA used for sequencing.

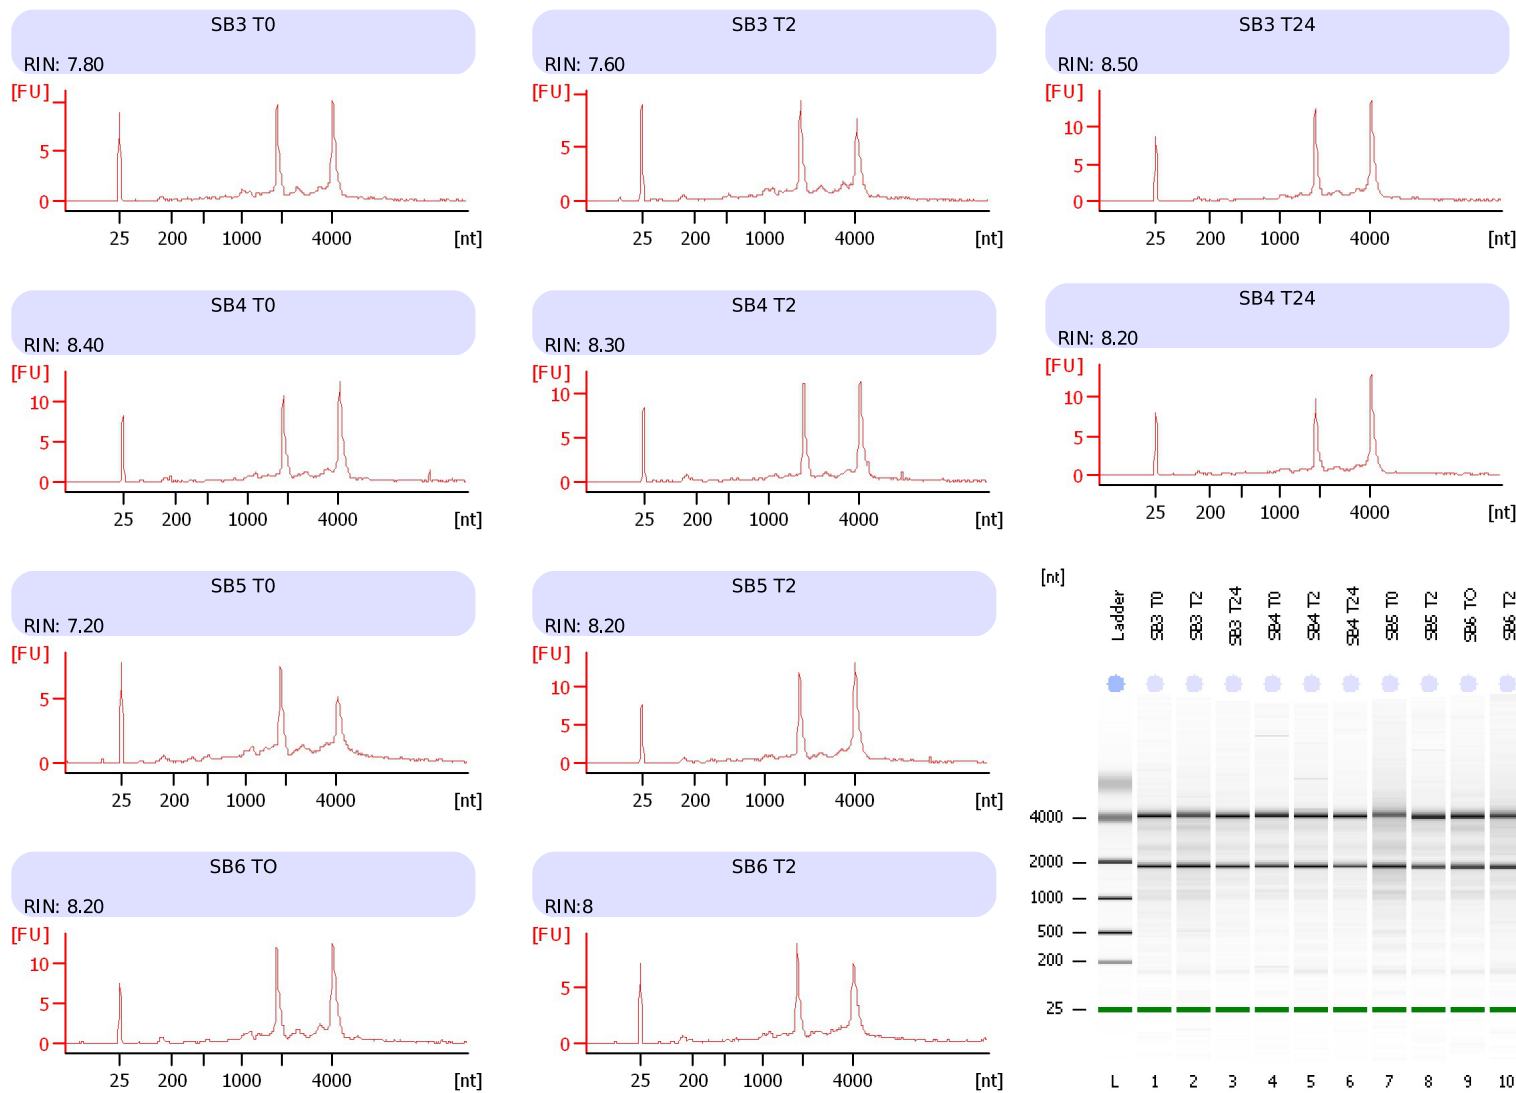

Supplement: srep42110-s4.pdf [file srep42110-s4.pdf]
